# Supplementary material for: Effect of Repeated Low-level Red Light on Myopia Prevention Among Children in China With Premyopia: A Randomized Clinical Trial
Source: PubMed Central journal article supplement (PMC10134010; doi:10.1001/jamanetworkopen.2023.9612), 2023-04-26
Supplement: jamanetwopen-e239612-s001.pdf [file jamanetwopen-e239612-s001.pdf]

1  
2  
3  
4  
5  
6  
7  
8  
9  
10  
11  
12  
13  
14  
15  
16  
17  
18  
19  
20  
21  
22  
23  
24  
25  
26  
27

**PROTOCOL OF PROCEDURES FOR THE REPEATED  
LOW-LEVEL RED-LIGHT INTERVENTION STUDY**

**Effect of Repeated Low-Level Red-Light on  
Myopia Prevention in Premyopic Children**

**Principal Investigators:** Prof. Xun Xu and Mingguang He

**Institution:** Shanghai Eye Disease Prevention and Treatment Center,  
Shanghai, China.

**Tel:** +86 13386259538

**Version Number:** 2.0, January 2021

28 **Table of Contents**

29 Protocol Summary.....4  
30 1. Introduction .....5  
31 2. Methods .....6  
32 3. Interventions allocation ..... 11  
33 4. Data collection, management, and analysis ..... 12  
34 5. Monitoring ..... 14  
35 6. Ethics and transmission ..... 15  
36 7. Insurance ..... 16  
37 Reference..... 16

38 **Protocol Summary**

39

| <b>Summary</b>                                   |                                                                                                                                                                                                                                                                                                                                                                                                                                                                                  |
|--------------------------------------------------|----------------------------------------------------------------------------------------------------------------------------------------------------------------------------------------------------------------------------------------------------------------------------------------------------------------------------------------------------------------------------------------------------------------------------------------------------------------------------------|
| <b>Purpose and Principle</b>                     | A randomized controlled trial exploring the effectiveness of low-dose single-wavelength red light on the prevention of myopia and the decrease of myopia incidence rate in children of grade 1-4 of primary schools (age of 6-11 years).                                                                                                                                                                                                                                         |
| <b>Primary Objective</b>                         | To investigate the efficacy of low-level red-light of reducing myopia onset in premyopic children.                                                                                                                                                                                                                                                                                                                                                                               |
| <b>Secondary Objective</b>                       | To investigate the effect of low-level red-light on spherical equivalent, axial length, uncorrected visual acuity of premyopic children.                                                                                                                                                                                                                                                                                                                                         |
| <b>Study Design</b>                              | Randomized controlled trial                                                                                                                                                                                                                                                                                                                                                                                                                                                      |
| <b>Study Population</b>                          | Students of grades 1-4 in the participating schools in Shanghai                                                                                                                                                                                                                                                                                                                                                                                                                  |
| <b>Inclusion Criteria</b>                        | 1) Students of grades 1-4 in the participating schools.<br>2) Sign informed consent to participate in screening and follow-up.<br>3) Children at a premyopic state:<br>① At least one parent with myopia (at least one eye SER <-3.0 D)<br>② $-0.5D < \text{cycloplegic SER of worse eye} \leq 0.5D$                                                                                                                                                                             |
| <b>Exclusion Criteria</b>                        | 1) Inability to obtain informed consent.<br>2) Children have astigmatism of 1.50 D or more, anisometropia of 1.50 D or more, strabismus, amblyopia, binocular vision abnormalities and other ocular abnormalities.<br>3) Children have any systemic diseases.<br>4) Children have any history of any myopia prevention interventions (e.g., low dose atropine).<br>5) Children have other reasons that the study physician considers inappropriate for inclusion in the project. |
| <b>Baseline and Follow-up of Eye Examination</b> | The baseline examination is in April 2021. The follow-up visits are in July 2021, October 2021, and January 2022. A total of five time points are examined in April 2022.                                                                                                                                                                                                                                                                                                        |

|                                  |                           |                                                                                                                                                                                           |
|----------------------------------|---------------------------|-------------------------------------------------------------------------------------------------------------------------------------------------------------------------------------------|
| <b>Study Duration</b>            |                           | The baseline examination is in April 2021 , and the follow-up will be finished in April 2022. The study lasts for 12 months.                                                              |
| <b>Interventions</b>             | <b>Intervention Group</b> | Children in the intervention group receive low-level red-light therapy 5 days per week and twice per day with each session lasting 3 minutes and an interval of at least 4 hours between. |
|                                  | <b>Control Group</b>      | Children in the control group do not receive low-level red-light therapy but continued their usual daily activities.                                                                      |
| <b>Statistical Hypothesis</b>    |                           | Low-level red-light therapy can prevent the myopia onset and reduce myopia incidence among premyopic children.                                                                            |
| <b>Keywords</b>                  |                           | School-age children, low-level red-light, myopia onset prevention                                                                                                                         |
| <b>Supplementary Information</b> |                           | None                                                                                                                                                                                      |

40

41

42 **1 Introduction**

43 **1.1. Study background and principle**

44 Myopia is the most common refractive error. It has been epidemic worldwide, especially in  
45 East Asia. China has one of the highest myopia prevalence among adolescents in the world,  
46 with 15%-80%<sup>1,2</sup> of urban-dwelling adolescents, which is 1.5-5.6 times higher than that in  
47 Chile<sup>3</sup> and 11.4-30.8 times higher than that in Nepal<sup>4</sup>. According to the World Health  
48 Organization, myopia has become one of the leading causes of visual impairment worldwide.  
49 The high cost of optical measurement or surgery for myopia correction each year places a  
50 heavy burden on society. Preventing myopia and controlling myopia progression has become  
51 a public health problem which needs to be addressed.

52 In order to effectively strengthen the prevention and control of myopia among children and  
53 adolescents in China, the Ministry of Education, together with eight departments including the  
54 National Health Commission, formulated the “Implementation Plan for Comprehensive  
55 Prevention and Control of Myopia among Children and Adolescents” on 30 August 2018, and  
56 jointly with the government, schools, medical and health institutions, families and students,  
57 which aims to reduce the overall myopia prevalence among children and adolescents  
58 nationwide by more than 0.5% per year by 2023 from the 2018 level, and reduce it by more  
59 than 1% per year in provinces with a high prevalence of myopia. In addition, it is expected that  
60 by 2030, the myopia prevalence will be controlled at around 3% among 6-year-old children and  
61 will be reduced to less than 38% among primary school students, less than 60% among junior  
62 high school students, and less than 70% among senior high school students.

63 It is important to note that the development of myopia is a dynamic process. Myopia prevention  
64 requires intervention prior to the onset of myopia, which needs to define the “premyopia state”,  
65 i.e., a refractive state that is temporarily emmetropia, with normal visual acuity and refractive  
66 error, but at a relatively high risk to develop myopia. Previous studies have shown that the risk  
67 factor scores for premyopia include the axial length growth pattern, hyperopic reserve, ocular  
68 biology, number of parental myopia, parental education, indoor/outdoor activity time and  
69 genomic risk.<sup>5-9</sup> The International Myopia Institute suggests that premyopia is defined as a  
70 refractive status between -0.50 D and 0.75 D in school-aged children, where age and other  
71 quantifiable risk factor scores indicate a significantly increased risk of myopia and warrant  
72 preventive intervention<sup>10</sup>.

73 Interventions in children with premyopia to prevent the onset of myopia have been a  
74 long-standing medical endeavor. A retrospective study including school-aged 6-12 years old  
75 children with premyopia (defined as spherical equivalent < 1.0 D) in Taiwan, China, has  
76 demonstrated that low concentration atropine (0.025%) could effectively prevent the 1-year  
77 incidence of myopia (21% vs. 54%, P = 0.016).<sup>11</sup> The Singapore Phase III Atropine for the  
78 Treatment of Childhood Myopia Study (ATOM 3) has included school-aged 5-9 years old  
79 children with premyopia and low myopia (defined as spherical equivalent between -1.50 D and  
80 +1.0 D, cylinder power > -1.50 D, uncorrected visual acuity  $\geq$  0.8, and followed-up for 2.5 years  
81 to investigate the effectiveness of low concentration atropine (0.01%) in preventing myopia  
82 and reducing the progression of low myopia.

83 Low-level red-light therapy has been widely used for neurotrauma and stroke, and provides an  
84 innovative, non-invasive treatment for severe vision-impairing eye diseases such as  
85 age-related macular degeneration, amblyopia, diabetic retinopathy and Leber hereditary optic

86 neuropathy.<sup>12,13</sup> Some studies have suggested that the mechanism of low-level light therapy  
87 does not rely on the thermal effect of conventional light therapy, but rather on the  
88 photochemical conversion potential of low-level red-light, which could induce photochemical  
89 reactions in ocular tissues, increase cytochrome C oxidase activity, alter gene expression to  
90 regulate the mitochondrial respiratory chain, and increase the biological activity of nitric  
91 oxide.<sup>14-18</sup> We hypothesize that low-level light therapy can increase choroidal metabolic rate  
92 and circulation through the above-mentioned mechanisms, thereby improving scleral hypoxia  
93 and preventing the development and progression of myopia.

94 Preliminary results from the multi-center study led by our hospital suggested that low-level  
95 single-wavelength red-light was a safe intervention which did not cause detectable functional  
96 damage to the retina or macula, while significantly reducing the progression of myopia. This  
97 real-world study will for the first-time focus on typical primary schools to investigate the  
98 feasibility and effectiveness of low-level red-light therapy in reducing the prevalence of myopia  
99 in schools by preventing myopia in premyopic school-aged children. If the study is successful,  
100 it will provide new insights for comprehensive myopia prevention and control among children  
101 and adolescents.

102

### 103 **1.2 Study purpose**

104 Children aged 6-11 years old who meet the inclusion criteria in selected schools in Shanghai  
105 are include. A one-year randomized controlled trial is conducted to investigate the efficacy of  
106 repeated low-level red-light (RLRL) of preventing myopia onset and reducing its incidence.

107

### 108 **1.3 Study design**

109 To investigate the effects of RLRL on preventing myopia onset and reducing the incidence of  
110 myopia, several primary schools in Shanghai will be selected as participating schools in this  
111 study. Children from grades 1-4 in participating schools with non-cycloplegic spherical  
112 equivalent refraction (SER)  $< 1.0$  and uncorrected visual acuity  $\geq 0.8$  are first screened based  
113 on refractive screening data. These children then answer the questionnaire and undergo  
114 cycloplegia and those with  $-0.5 < \text{cycloplegic SER of worse eye} \leq +0.5$  D and at least one  
115 parent with myopia (at least one eye SER  $\leq -3.0$  D) were included. Participants are stratified  
116 by grade and randomized into an intervention group and a control group at the ratio of 1:1.

117 The intervention is implemented according to the following steps: In the intervention group,  
118 subjects receive RLRL interventions in a temporary intervention room at school twice per day  
119 from Monday to Friday (each intervention lasts 3 minutes with an interval of at least 4  
120 hours).No RLRL intervention will be performed in the control group.

121 For the enrolled schools, standard screenings will be completed at baseline (in April 2021).  
122 The follow-up visits are in July 2021, October 2021, and January 2022. A total of five time  
123 points are examined in April 2022. The prevalence of myopia and the effect of RLRL on  
124 preventing the onset of myopia will be determined by comparing the incidence of myopia in the  
125 intervention and control group.

126

127

## 128 **2 Methods**

### 129 **2.1 Study site**

130 Children aged 6-11 years who meet the inclusion criteria from grades 1-4 in selected primary  
131 schools will be enrolled as participants. Myopia examination will be conducted at 5 time points  
132 to determine the incidence and prevalence of myopia.

133 Temporary intervention rooms will be set up in the participating schools with a sufficient  
134 number of red-light intervention devices. Children with premyopia are identified according to  
135 the inclusion and exclusion criteria, and then randomized by grade within each school, and  
136 divided into intervention and control groups. RLRL will be implemented in the intervention  
137 group.

138

## 139 **2.2 Inclusion criteria**

140 1 ) Current students in grades 1-4 at participating schools (aged between 6 and 11 years old at  
141 baseline)

142 2 ) Sign informed consent to participate in screening and follow-up.

143 3 ) Children at a premyopic state are identified with the following diagnostic criteria:

144 ① At least one parent with myopia (at least one eye SER  $\leq -3.0$  D)

145 ②  $-0.5D < \text{cycloplegic SER of worse} \leq 0.5D$

146

## 147 **2.3 Exclusion criteria**

148 1) Inability to obtain informed consent.

149 2) Children have astigmatism of 1.50 D or more, anisometropia of 1.50 D or more, strabismus,  
150 amblyopia, binocular vision abnormalities and other ocular abnormalities.

151 3) Children have any systemic diseases.

152 4) Children have any history of any myopia prevention interventions (e.g., low dose atropine).

153 5) Children have other reasons that the study physician considers inappropriate for inclusion in  
154 the project.

155

## 156 **2.4 Implementation of intervention measures**

157 Red-light intervention:

158 The intervention in this study is repeated low-level single-wavelength red-light, which was  
159 based on the red-light intervention instrument (Suzhou Xuanjia Optoelectronic Technology Co.,  
160 LTD., China), which is a benchtop semiconductor low-level single-wavelength red-light  
161 amblyopia interferometer. The target organ of low-level single-wavelength red-light  
162 intervention was the fundus of participants. Certified by the National Photoelectric Products  
163 Radiation Safety Quality Supervision and Inspection Center, its radiation category belongs to  
164 Class I. According to the national safety standard for laser products (GB7247.1-2012),  
165 radiation category 1 can be used safely in the eye. The product has obtained the Class II  
166 medical device registration certificate, and the manufacturer has medical device production  
167 license. The instrument is already on the market and widely used in major hospitals.

168

169 Main technical performance indicators of the intervention instrument:

170 1) Input power  $\leq 100VA$ , input voltage: AC10V-240V, 50Hz/60Hz

171 2) Low-level single-wavelength red-light wavelength:  $650\text{nm}\pm 10\text{nm}$   
172 3) Diameter of low-level single-wavelength red-light cursor:  $7\text{mm}\pm 3\text{mm}$ , spot at the  
173 observation port:  $10\text{mm}\pm 2\text{mm}$   
174 4) Light source output power:  $2.0\text{mW}\pm 0.5\text{mW}$ ; At a distance of  $100\text{mm}$ :  $1.07\text{-}1.42\text{mw}$ ; After  
175 obtaining informed consent from the premyopic school-age children and their parents in the  
176 intervention group, the operation procedure of the intervention instrument will be explained by  
177 video, the correct method of the intervention instrument is demonstrated, and relevant  
178 instructional videos are shared for teachers, coordinators and parents to watch at any time.  
179 The premyopic school-age children in the intervention group are treated with the intervention  
180 instrument twice a day from Monday to Friday, three minutes each time, with an interval of at  
181 least 4 hours (morning break before school and afternoon break before school), under the  
182 supervision of the school teacher/coordinator in addition to routine study and life. All children  
183 have a unique corresponding personal account and password. They need to swipe the card  
184 and log in the system for verification before starting the intervention device.

185 Specific operation steps of low intensity single wavelength red light intervention instrument are  
186 as follows:

- 187 1) Put the instrument on a stable table, confirm the interface before connecting the  
188 accessories.
- 189 2) Connect the power supply and turn on the power switch.
- 190 3) Let the subject sit in an appropriate position, loosen the hand wheel on the side of the  
191 intervention instrument, adjust up and down to the most appropriate position, so that the eye is  
192 relatively comfortable when leaning on the eye patch, and fix the handwheel to a fixed angle.
- 193 4) The subject holds the corresponding card, swipes the card and clicks to confirm login.
- 194 5) After login, the first interface will enter the optical kinetic energy intervention item by default.  
195 Take off the glasses and click "OK". First, make sure that there is visible red light in the position  
196 of the eyes corresponding to the instrument, and then put the eyes close to the blue eye patch.
- 197 6) Before each use, please put the hands on the top of the intervention instrument and adjust  
198 the pupil distance wheel at the top. It is better to adjust two points of light to one point. If two  
199 points of light cannot be fused into one, adjust to see the brightest.
- 200 7) The optical energy will stop automatically after three minutes of use, leave the blue eye  
201 patch, close your eyes and rest for 3-5 minutes until the light spots before your eyes disappear.
- 202 8) Turn off the instrument after use.

203

204 Observation of intervention compliance:

205 The premyopic school-age children in the intervention group are treated in the intervention  
206 room set up in each school. Each time a card is needed to swipe into the system and start the  
207 intervention program. Therefore, the actual startup and usage can be observed in the  
208 background. In addition to the registration of the supervisor who supervises the school,  
209 another 2 project staff members are assigned to observe the intervention compliance. Monitor  
210 the usage according to the background database and conduct usage time statistics once a  
211 week. For children who use it less than 8 times per week, remind the school supervisor, and  
212 check the intervention situation of the school from time to time.

213

214 Criteria for discontinuation of observation:



215 The premyopic school-age children in the intervention group experienced unexpected severe  
216 adverse events (including sharp visual loss of more than two lines or central dark spots in the  
217 visual field), require withdrawal from the study, or undergo intraocular surgery midway.  
218

## 219 **2.5 Outcomes**

220 2.5.1 Primary outcome:

221 1-year cumulative incidence of myopia in intervention and control groups (%)  
222

223 2.5.2 Secondary outcomes

224 1) Spherical equivalent (SE, D) and axial length progression in the intervention group and  
225 control group

226 2) Changes of uncorrected visual acuity (UCVA) and best corrected visual acuity (BCVA) in the  
227 intervention group and the control group

228 3) Changes of choroid thickness (CT) in the intervention group and the control group  
229

230 2.5.3 Definition of myopia:

231 A cycloplegic SER (sphere plus half of cylinder)  $\leq$  -0.50 D.  
232

233 2.5.4 Side effects:

234 Adverse events, e.g., afterimage duration exceeded 6 minutes, eye discomforts including but  
235 not limited to pain, itching, dryness, dazzling, short-term glare and flash blindness, severe  
236 adverse events including sudden visual loss of  $\geq 2$  lines or a scotoma perceived by the children  
237 in the center of the viewing field.  
238

## 239 **2.6 Subject schedule**

240 The study will complete the baseline examination in April 2021. The follow-up visits are in July  
241 2021, October 2021, and January 2022. A total of five time points are examined in April 2022.  
242

243

## 244 **2.7 Work procedures**

245

246

247

248

249

250

251

252

253

254

255

256

257

258

259  
260  
261  
262

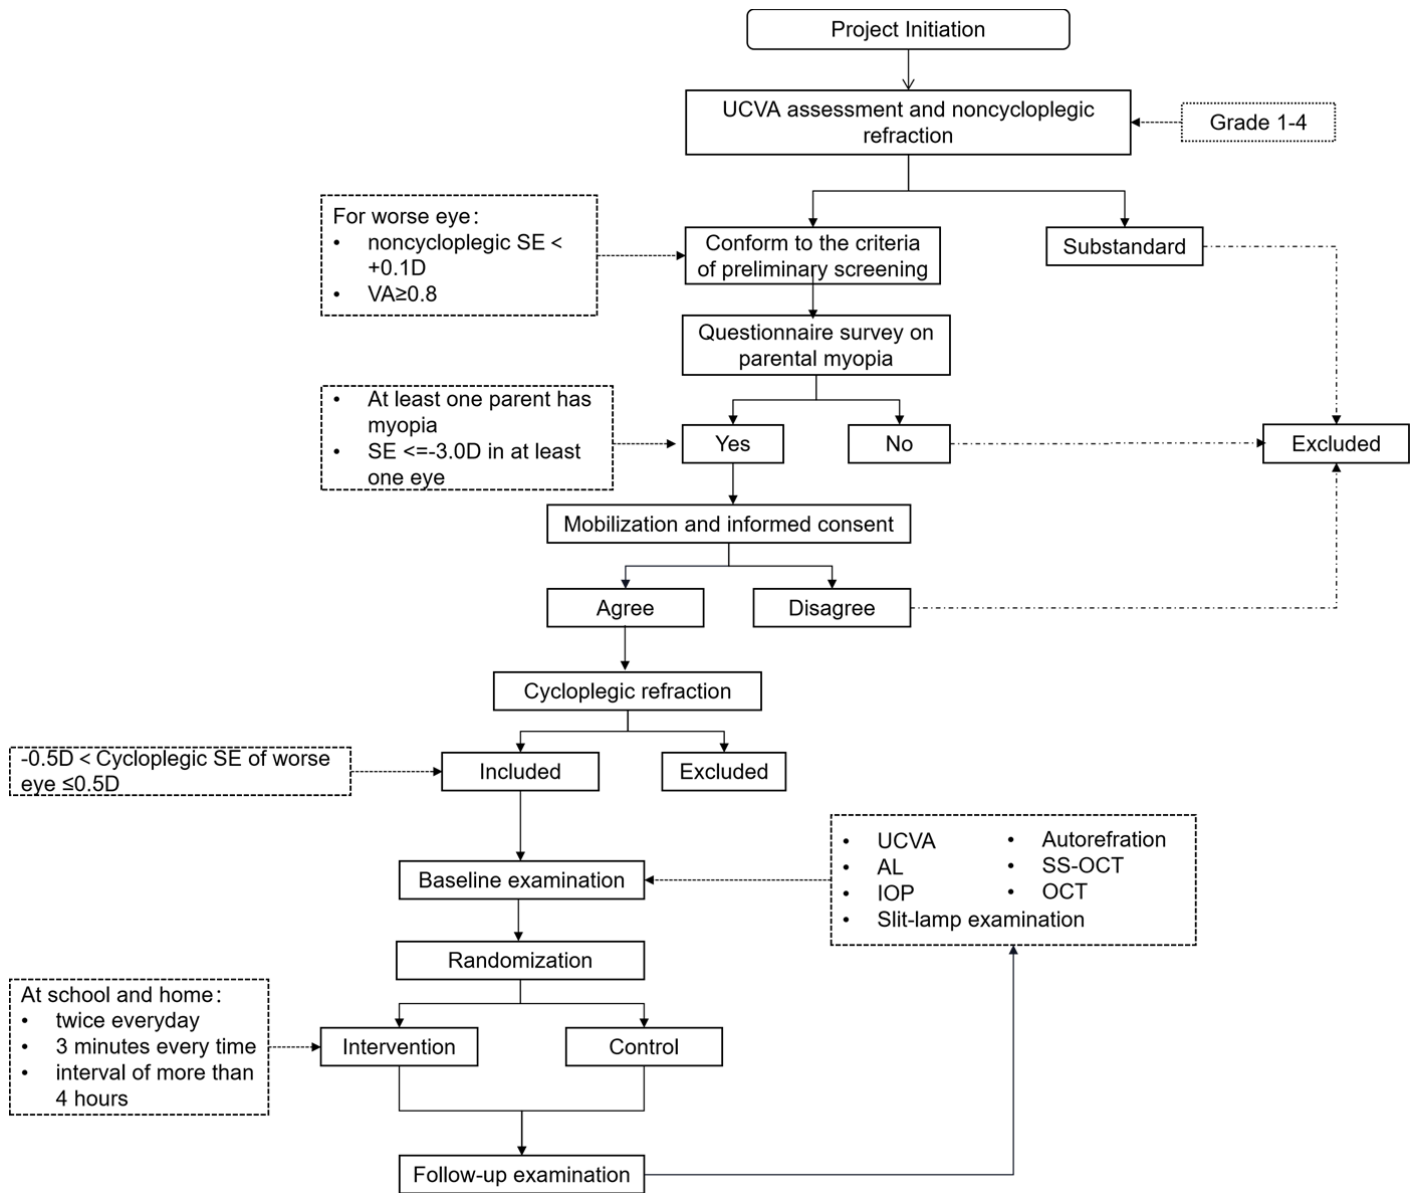

263 **2.8 Compliance management**

264 The coordinator shall uniformly manage and solve the problems encountered by students  
265 during operation, and at the same time supervise and record the relevant interventions.  
266 Through the user account, count the number of backstage usage every week, carry out joint  
267 supervision with the coordinator, and randomly check the work of the coordinator to urge him  
268 to complete the recording and coordination work on time and quality.

269

270 **2.9 Sample size calculation**

271 This study is a real-world study based on selected elementary schools in Shanghai, and the  
272 sample size was calculated according to the district group randomization formula with the  
273 following parameter settings: according to the data from previous studies, the average annual  
274 myopia incidence for elementary school students in grades 1-4 is 42%, and it is expected that  
275 the use of low-level single-wavelength red-light in schools can reduce the incidence of myopia  
276 by 50%, i.e., the incidence of myopia decreases to 21%. A total of 202 students are required  
277 based on a test efficacy of 90% and  $\alpha=0.05$ . Considering a participation rate of 90% and a  
278 missed visit rate of less than 10% per year, a total of 254 individuals would be required.

279

280 **2.10 Recruitment**

281 Some primary school children in Shanghai will be invited to participate in this study. First,  
282 school-age children in grades 1-4 in participating schools will be screened for non-cycloplegic  
283 spherical equivalent (SE) less than 1.0 D and UCVA  $\geq 0.8$  based on refractive developmental  
284 profile data and undergo cycloplegia. Those with  $-0.5 D < \text{cycloplegic SE of worse eye} \leq +0.5$   
285 D and at least one parent has myopia (SER  $\leq -3.0D$ ) will be selected and the intervention and  
286 control groups were formed according to the intra-school matched-grade individual  
287 randomization method.

288

289

290 **3 Interventions allocation**

291 **3.1 Randomization**

292 To avoid bias, The study will use a computer system centrally controlled randomization method  
293 to achieve central randomized grouping.

294

295 **3.2 Allocation concealment**

296 After the investigators in each center access the server through the web and enter the  
297 information of individuals, the computerized randomization system will divide the individuals  
298 according to the random assignment table and lock the division information of individuals in the  
299 system.

300

301 **3.3 Allocation implementation**

302 In the central randomization system, the statistical expert in charge of randomization designs  
303 the randomization parameters in advance in the background, and the system generates the  
304 random assignment table.

305

306 **3.4 Blinding**

307 In this study, the grouping and other information will be concealed from the eye examiners and  
308 data analysts, and a single blind is set up.

309

310

#### 311 **4 Data collection, management, and analysis**

##### 312 **4.1 Data collection**

313 The examination consists of one baseline and four follow-up examinations. Detailed content or  
314 description are described as follows:

315 1) Registration: Name, date of birth, gender, ethnicity, contact information, school and class  
316 information.

317 2) Questionnaire (for follow-ups only): Subjective questions on discomfort after intervention.

318 3) Distant visual acuity test: ETDRS Log MAR E visual acuity chart (Precision Vision, Villa Park,  
319 Illinois, USA) is used to test binocular uncorrected visual acuity by trained personnel.

320 4) Axial length measurement: IOL Master (version 5.02, Carl Zeiss Meditec, Germany) is used  
321 for axial length measurement. Calibrate with a simulated eye before measurement. Each eye  
322 is measured 3 times to have the average value obtained, and the difference between each two  
323 values should be less than 0.02 mm. Those with large fluctuations despite multiple  
324 measurements is recorded.

325 5) Intraocular pressure (IOP) measurement: non-contact tonometer (NT-4000, Nidek Company,  
326 USA) is used to test IOP. Each eye is measured 3 times with the average value obtained. The  
327 difference between each two values should be less than 5 mmHg. Those higher than 24  
328 mmHg should be recorded, and visual field examination should be done. Details of visual field  
329 inspection are to be determined.

330 6) Ophthalmologist examination: Ophthalmologist examination consists of anterior segment  
331 slit lamp examination (66 Vision. Tech, Suzhou) and ophthalmoscopy (66 Vision. Tech,  
332 Suzhou). The anterior segment slit lamp examination includes examination of eyelids,  
333 conjunctiva, cornea, anterior chamber, iris, pupil, lens, and anterior vitreous body, and is  
334 performed by senior experienced ophthalmologists. Those with peripheral anterior chamber  
335 depth less than 1/2 corneal thickness, or those who have acute anterior segment inflammation,  
336 or other related diseases, and are not suitable for further cycloplegia, will be recorded. Either  
337 will the examination be suspended, or they be excluded from this study. In addition, methods  
338 such as corneal light reflection, cover-uncover, etc. are used for strabismus detection and  
339 typing (phoria or manifest strabismus). Those with manifest strabismus will be excluded. The  
340 eyelids, conjunctiva, cornea, sclera, iris, lens, vitreous body and fundus retina are checked for  
341 abnormalities and changes.

342 7) Cycloplegia: Instill 1 drop of 0.5% proparacaine (Alcaine, Alcon Company) into the  
343 conjunctival sac of each eye, followed by 2 drops of 1% cyclopentolate (Cyclogyl, Alcon), with  
344 5 minutes between each drop. After each drip, instruct the student to press the inner canthus  
345 softly for a few seconds, and try to adopt the posture of leaning his head back. Check light  
346 reflex 30 minutes after the last drop of cyclopentolate. Cycloplegia is considered complete if  
347 the light reflex disappears and the pupil diameter exceeds 6 mm. A third drop of cyclopentolate  
348 is needed if the light reflex still exists. Recheck the light reflex and pupil diameter after 20  
349 minutes. Record if light reflex persists. Any eye discomfort should be carefully examined and  
350 corresponding treatment should be given by the ophthalmologist during the process of

351 cycloplegia.  
352 8) Automatic optometry test: Automatic optometry (Topcon KR8800) is used to measure the  
353 spherical diopter, cylindrical diopter, and axial direction of both eyes. A complete inspection is  
354 done according to the standard operating requirements of the autorefractor.  
355 9) Swept-source OCT (SS-OCT) examination: SS-OCT (DRI OCT Triton, Topcon, Tokyo,  
356 Japan) examination is performed after cycloplegia. Imaging site: macula + optic disc area,  
357 mode: 12\*9 mm 3D scan mode (4 overlap)/Line scan (64 overlap) + macular area 9 mm radial  
358 scan mode (16 overlap, follow up mode) + optic disc area 9 mm radial scan mode (16 overlap,  
359 follow up mode) + macular area 7\*7 mm 3D scan mode (4 overlap) + optic disc area 6\*6 mm  
360 3D scan mode (4 overlap). Requirements: Input spherical lens, cylindrical lens, eye axis and  
361 corneal curvature radius correction magnification before imaging; image signal strength of 3D  
362 scan mode should not be lower than 50, radial scan mode 60; avoid flip mirrors on the image  
363 of the peripheral area; manually adjust the capture center to the center of the optic disc when  
364 imaging the optic disc area; re-image if the quality is affected by blinking or eye movement  
365 during the process. Record if satisfying images fail to be obtained after multiple tries. The  
366 SS-OCT comes with an innate function of color fundus photography. When photographing, the  
367 imaging site is required to be consistent with the SS-OCT scanning site. Avoid eyelids,  
368 eyelashes or hair covering, and dark areas in the image, as well as a lower-than-90 image  
369 quality.

370

#### 371 **4.2 Data management**

372 A paper form was used during the examination to complete the registration of the subject's  
373 personal information, record the completeness of the examination process, and the device  
374 printed the results and attached them to the examination form as required. Data collected on  
375 site is entered instantly using the clinical data platform (EDC) system, ensuring that all  
376 required fields are entered and submitted after the system indicates that there are no missing  
377 values. The raw data captured by the equipment will be uploaded simultaneously via the  
378 collection device provided by the project. Upon completion of the examination, paper  
379 examination forms will be kept in a locked cabinet in the research center to protect the privacy  
380 of the participants and to locate and check the raw data.

381

#### 382 **4.3 Statistical analysis plan**

383 The aim of this study was to investigate the effect of low-level single-wavelength red-light on  
384 prevent myopia and reduce the incidence of myopia in schools. Myopia in this study is defined  
385 as equivalent spherical (SE)  $\leq -0.50$  D based on cycloplegic autorefraction results.

386

387 Data analysis will be performed under the intention-to-treat (ITT) and and per-protocol (PP)  
388 principle. All subjects who complete the protocol and those who fail to complete the protocol  
389 but do not withdraw from the study will be included in the analysis. For subjects who withdraw  
390 from the study, valid data collected before withdrawal will be included in the analysis data set.

391

392 The primary outcome is the incidence of myopia, and secondary outcomes are the progression  
393 of SE, AL, UCVA, BCVA, and CT.

394

395 Descriptive statistics: Continuous variables: sample size, mean, standard deviation, minimum,  
396 maximum, quartile.

397 Categorical variables: frequency distribution.

398

399 To compare the incidence of myopia in the intervention and control groups, a chi-square test  
400 will be used. For statistical analysis based on other secondary outcomes, the data from the  
401 worse eye will be taken for analysis. If quantitative traits conform to a normal distribution, the  
402 significance will be tested according to an unpaired t-test. If they do not conform to a normal  
403 distribution, the significance will be tested by non-parametric statistical methods or by taking  
404 cut-off points according to clinical significance, calculating the proportions of categorical  
405 variables and testing significance by chi-square tests.

406

407 Sensitivity analyses based on the protocol strategy will be performed to investigate the efficacy  
408 of repeated low-level red light therapy on primary outcome and secondary outcomes.  
409 Sensitivity analyses will be further performed to assess efficacy of repeated low-level red-light  
410 therapy across different refraction groups and age groups.

411

## 412 **5 Monitoring**

### 413 **5.1 Data Monitoring**

414 An independent Data and Safety Monitoring Committee was established. all of the members  
415 are independent of the project sponsor and have no conflict of interest. Members of the Data  
416 and Safety Committee regularly review the data collection process, storage, and analysis, and  
417 have access to the raw data associated with this clinical study to determine the completeness,  
418 accuracy and consistency of the information with the original data holdings. Relevant  
419 information needs to be readily available to members of the Data and Safety Committee. The  
420 Data and Safety Committee Board is required to review all data and informed consent.

421

### 422 **5.2 Risks/hazards (adverse reactions)**

423 The intervention used in this study is the Eyersing Amblyopia Intervention Device, which has  
424 received a national safety test certificate, and a Class II medical device registration certificate,  
425 and the manufacturer has a medical device manufacturing license. The intervention device  
426 has been marketed and is widely used in major hospitals. It has been used clinically for more  
427 than ten years in the field of amblyopia treatment and has no known side effects on the  
428 structural function of the eye. The intervention device uses a diode to produce a single  
429 wavelength of visible red light at  $650\pm 10$  nm, reaching the eye with an energy range of 1.07 to  
430 1.42 mw. It has been certified by the National Centre for Radiation Safety and Quality  
431 Supervision and Inspection of Optoelectronic Products as Class I radiation. According to the  
432 document GB 7247.1-2012 "Safety of Radiation Products Part I: Equipment Classification,  
433 Requirements", radiation is safe for use in the eye. After using the intervention device, there  
434 may be a temporary reaction of dazzling, flash blindness, and post-optical light spots, which  
435 may resolve themselves after a few minutes of rest with eyes closed.

436

### 437 **5.3 Audit**

438 An auditing team independent of the sponsor is set up by the investigator to visit each school

439 study site 1-2 weeks at the start of the project to provide guidance and training and to review  
440 the progress of the trial implementation.

441

442

## 443 **6 Ethics and transmission**

### 444 **6.1 Ethical approval**

445 Apply to ethics committees of Shanghai General hospital for review and approval. The protocol  
446 is implemented after approval of ethics committee and the procedure should meet the  
447 regulations and requirements of responsible institutions. Once it's approved, the adjusted  
448 protocol should be reapproved by ethics committee before its implementation.

449

### 450 **6.2 Protocol adjustment**

451 Adjustments of protocol should be reviewed and approved by sponsors and ethics committee  
452 before its implementation, unless it is intended to eliminate the emergent harm to the subject,  
453 or it's only about administrative management and/or logic concerns of the study (such as  
454 changing phone number).

455

### 456 **6.3 Informed consent**

457 Procedures and documentation in the study should be reviewed and approved by ethics  
458 committee before use. The process of informed consent provides continuous explanations so  
459 that they can fully understand and consider before deciding whether to start or continue the  
460 study. Researchers will discuss the content of the study with the subjects and their  
461 parents/guardians. Subjects and their parents/guardians are able to ask questions before,  
462 during and after study. Subjects and their parents/guardians have the right to be informed  
463 during the study and can quit the study without reasons anytime.

464 The informed consent of participants provides the scheme of the study, including purpose of  
465 the study, procedures and scheduled plans, potential risks, and benefits as well as alternative  
466 interventions. The informed consent also explains the rights once the subjects participate in  
467 the study. The subjects should be given enough time to consider whether to participate in the  
468 study, and if they agree to be volunteers, they need to sign the informed consent.

469

### 470 **6.4 Secrecy**

471 According to agreements, all the involved must keep confidential during the trial. All data  
472 related cannot be visited without permission. Private information of participants will be  
473 protected in reports and all publications of clinical research data.

474

### 475 **6.5 Interest statement**

476 The people in charge of the trial have no financial or other conflicts of interest.

477

### 478 **6.6 Data collection**

479 Statements about who have access to the final database and disclosure of the contract  
480 restricting researchers from obtaining final data of the trial.

481

### 482 **6.7 Subsidiary and care after trial**

483 This study has no subsidiary and care after trial.

484

#### 485 **6.8 Communication policy**

486 In the last follow up, we will offer every participant a report describing their random state, final  
487 refractive state, and comparison of refractive state before and after the trial. Any subsequent  
488 publications will be provided to every participant who request it for free. Results of the study  
489 will be published in public as part of the papers of research team and can be obtained in the  
490 library.

491

492

#### 493 **7 Insurance**

494 Accident insurance of clinical trial will be provided to all children enrolled by researchers.

495

496

497

498

#### 499 **Reference**

500 1. He M, Zeng J, Liu Y, Xu J, Pokharel GP, Ellwein LB. Refractive error and visual impairment  
501 in urban children in southern china. *Invest Ophthalmol Vis Sci.* 2004;45(3):793-799.  
502 doi:10.1167/iovs.03-1051

503 2. Zhao J, Pan X, Sui R, Munoz SR, Sperduto RD, Ellwein LB. Refractive Error Study in  
504 Children: results from Shunyi District, China. *Am J Ophthalmol.* 2000;129(4):427-435.  
505 doi:10.1016/s0002-9394(99)00452-3

506 3. Maul E, Barroso S, Munoz SR, Sperduto RD, Ellwein LB. Refractive Error Study in  
507 Children: results from La Florida, Chile. *Am J Ophthalmol.* 2000;129(4):445-454.  
508 doi:10.1016/s0002-9394(99)00454-7

509 4. Pokharel GP, Negrel AD, Munoz SR, Ellwein LB. Refractive Error Study in Children:  
510 results from Mechi Zone, Nepal. *Am J Ophthalmol.* 2000;129(4):436-444.  
511 doi:10.1016/s0002-9394(99)00453-5

512 5. Mutti DO, Hayes JR, Mitchell GL, et al. Refractive error, axial length, and relative  
513 peripheral refractive error before and after the onset of myopia. *Invest Ophthalmol Vis Sci.*  
514 2007;48(6):2510-2519. doi:10.1167/iovs.06-0562

515 6. Zadnik K, Sinnott LT, Cotter SA, et al. Prediction of Juvenile-Onset Myopia. *JAMA*  
516 *Ophthalmol.* 2015;133(6):683-689. doi:10.1001/jamaophthalmol.2015.0471

517 7. Zhang M, Gazzard G, Fu Z, et al. Validating the accuracy of a model to predict the onset of  
518 myopia in children. *Invest Ophthalmol Vis Sci.* 2011;52(8):5836-5841.  
519 doi:10.1167/iovs.10-5592

520 8. Jones-Jordan LA, Sinnott LT, Manny RE, et al. Early childhood refractive error and



- 521 parental history of myopia as predictors of myopia. *Invest Ophthalmol Vis Sci.*  
522 2010;51(1):115-121. doi:10.1167/iovs.08-3210
- 523 9. Tedja MS, Wojciechowski R, Hysi PG, et al. Genome-wide association meta-analysis  
524 highlights light-induced signaling as a driver for refractive error. *Nat Genet.*  
525 2018;50(6):834-848. doi:10.1038/s41588-018-0127-7
- 526 10. Flitcroft DI, He M, Jonas JB, et al. IMI - Defining and Classifying Myopia: A Proposed Set  
527 of Standards for Clinical and Epidemiologic Studies. *Invest Ophthalmol Vis Sci.*  
528 2019;60(3):M20-M30. doi:10.1167/iovs.18-25957
- 529 11. Fang PC, Chung MY, Yu HJ, Wu PC. Prevention of myopia onset with 0.025% atropine in  
530 premyopic children. *J Ocul Pharmacol Ther.* 2010;26(4):341-345.  
531 doi:10.1089/jop.2009.0135
- 532 12. Bjordal JM, Couppé C, Chow RT, Tunér J, Ljunggren EA. A systematic review of low level  
533 laser therapy with location-specific doses for pain from chronic joint disorders. *Aust J*  
534 *Physiother.* 2003;49(2):107-116. doi:10.1016/s0004-9514(14)60127-6
- 535 13. Peplow PV, Chung TY, Baxter GD. Laser photobiomodulation of wound healing: a review  
536 of experimental studies in mouse and rat animal models. *Photomed Laser Surg.*  
537 2010;28(3):291-325. doi:10.1089/pho.2008.2446
- 538 14. Karu TI, Pyatibrat LV, Afanasyeva NI. A novel mitochondrial signaling pathway activated  
539 by visible-to-near infrared radiation. *Photochem Photobiol.* 2004;80(2):366-372.  
540 doi:10.1562/2004-03-25-RA-123
- 541 15. Karu TI, Pyatibrat LV, Kolyakov SF, Afanasyeva NI. Absorption measurements of a cell  
542 monolayer relevant to phototherapy: reduction of cytochrome c oxidase under near IR  
543 radiation. *J Photochem Photobiol B.* 2005;81(2):98-106.  
544 doi:10.1016/j.jphotobiol.2005.07.002
- 545 16. Lohr NL, Keszler A, Pratt P, Bienengraber M, Warltier DC, Hogg N. Enhancement of nitric  
546 oxide release from nitrosyl hemoglobin and nitrosyl myoglobin by red/near infrared  
547 radiation: potential role in cardioprotection. *J Mol Cell Cardiol.* 2009;47(2):256-263.  
548 doi:10.1016/j.yjmcc.2009.03.009
- 549 17. Posten W, Wrone DA, Dover JS, Arndt KA, Silapunt S, Alam M. Low-level laser therapy for  
550 wound healing: mechanism and efficacy. *Dermatol Surg.* 2005;31(3):334-340.  
551 doi:10.1111/j.1524-4725.2005.31086
- 552 18. Zhang Y, Song S, Fong CC, Tsang CH, Yang Z, Yang M. cDNA microarray analysis of  
553 gene expression profiles in human fibroblast cells irradiated with red light. *J Invest*  
554 *Dermatol.* 2003;120(5):849-857. doi:10.1046/j.1523-1747.2003.12133.x
- 555
