# Supplementary material for: Effect of Repeated Low-level Red Light on Myopia Prevention Among Children in China With Premyopia: A Randomized Clinical Trial
Source: PubMed Central journal article supplement (PMC10134010; doi:10.1001/jamanetworkopen.2023.9612), 2023-04-26
Supplement: jamanetwopen-e239612-s002.pdf [file jamanetwopen-e239612-s002.pdf]

## Supplementary Online Content

He X, Wang J, Zhu Z, et al. Effect of repeated low-level red light on myopia prevention among children in China with premyopia: a randomized clinical trial. *JAMA Netw Open*. 2023;6(4):e239612. doi:10.1001/jamanetworkopen.2023.9612

**eFigure 1.** Schematic Diagram of Red Light Spectrum and Intervention Instrument

**eFigure 2.** Myopia Incidence in 6- and 12-Month Between the Intervention and Control Groups

**eFigure 3.** Spaghetti Plots of Longitudinal Data on SER

**eTable 1.** Baseline Characteristics of the Included Participants

**eTable 2.** Refractive and Biometric Outcomes at 6-Month Follow-up

**eTable 3.** Percentages of SER Regression in 6 and 12 Months

**eTable 4.** Baseline Characteristics Between Continued and Interrupted Intervention Groups

**eTable 5.** Refractive and Biometric Outcomes at 12-Month Follow-up Between Continued Intervention and Control Group

**eTable 6.** Refractive and Biometric Outcomes at 12-Month Follow-up in Different Baseline Age Groups

This supplementary material has been provided by the authors to give readers additional information about their work.

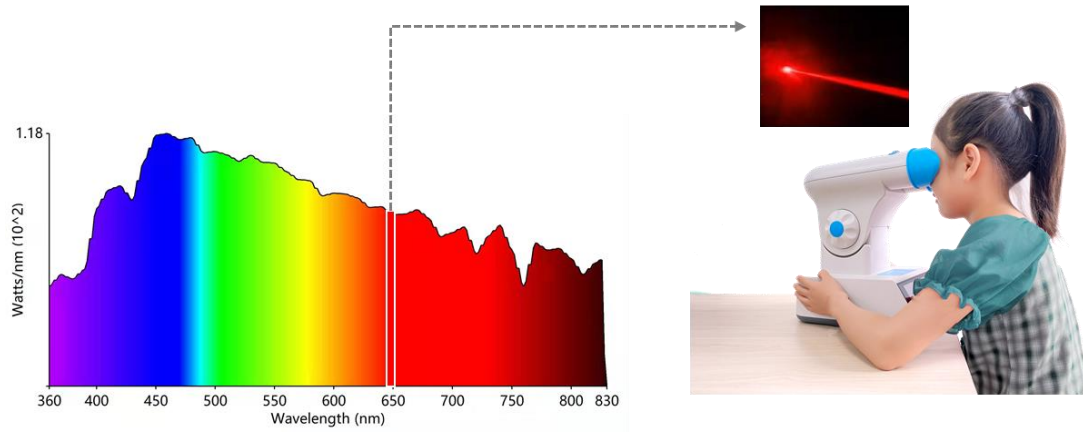

**eFigure 1.** Schematic Diagram of Red Light Spectrum and Intervention Instrument

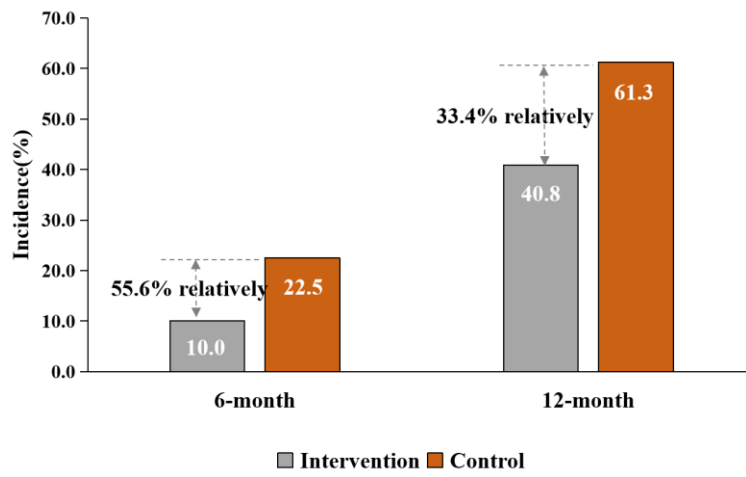

**eFigure 2.** Myopia Incidence in 6- and 12-Month Between the Intervention and Control Groups

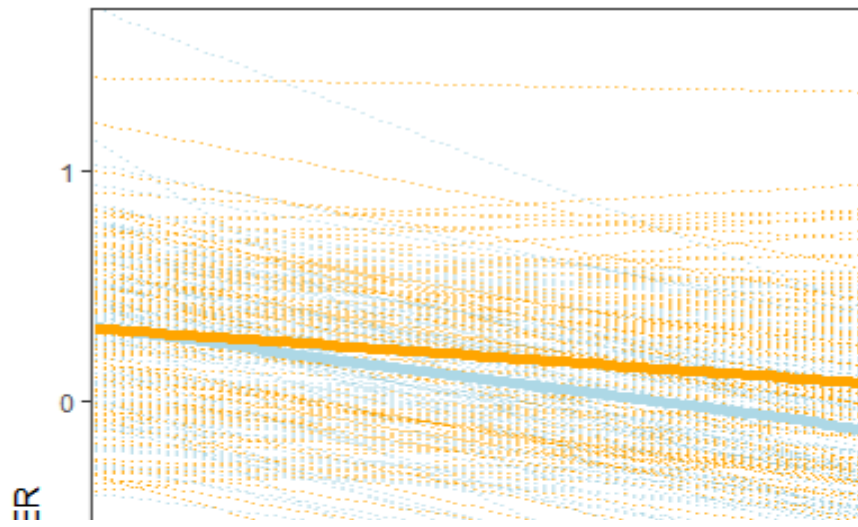

**eFigure 3.** Spaghetti Plots of Longitudinal Data on SER

**eTable 1. Baseline Characteristics of the Included Participants**

| Characteristics     | Intervention (N=139) | Control (N=139)     |
|---------------------|----------------------|---------------------|
| Age, mean (SD), yrs | 8.28 (1.10)          | 8.31 (1.07)         |
| Gender (boys)       |                      |                     |
| boys                | 51.1% (71/139)       | 48.9% (68/139)      |
| girls               | 48.9% (68/139)       | 51.1% (71/139)      |
| UCVA                |                      |                     |
| Mean (SD)           | 0.8 (0.2)            | 0.8 (0.2)           |
| Median (P25-P75)    | 0.8 (0.8,1.0)        | 0.8 (0.8,1.0)       |
| AL, mm              |                      |                     |
| Mean (SD)           | 23.36 (0.68)         | 23.30 (0.69)        |
| Median (P25-P75)    | 23.37 (22.97,23.82)  | 23.25 (22.80,23.71) |
| SER, D              |                      |                     |
| Mean (SD)           | 0.14 (0.30)          | 0.16 (0.28)         |
| Median (P25-P75)    | 0.25 (-0.13,0.38)    | 0.25 (-0.13,0.38)   |

Abbreviations: UCVA, uncorrected visual acuity; AL, axial length; SER, spherical equivalent refraction; SD, standard deviation.

**eTable 2.** Refractive and Biometric Outcomes at 6-Month Follow-up

|                   | Intervention   | Control        | Absolute efficacy<br>(Relative efficacy) | P value |
|-------------------|----------------|----------------|------------------------------------------|---------|
| Incidence         | 10.0% (12/120) | 22.5% (23/102) | 12.5% (55.6%)                            | 0.018*  |
| Change, mean (SD) |                |                |                                          |         |
| SER (D)           | 0.18 (0.35)    | -0.14 (0.46)   | -0.32 (228.6%)                           | <0.001* |
| AL (mm)           | 0.07 (0.13)    | 0.23 (0.16)    | 0.16 (69.6%)                             | <0.001* |

SER, spherical equivalent refraction; AL, axial length; SD, standard deviation

Absolute efficacy = value in control group - value in intervention group

Relative efficacy = (value in control group - value in intervention group)/value in control group

\* t-test for change of AL and SE; chi-square test for incidence.

**eTable 3.** Percentages of SER Regression in 6 and 12 Months

|         | Intervention   | Control        | P value |
|---------|----------------|----------------|---------|
| 6M      |                |                |         |
| >=0.25D | 51.2% (62/121) | 24.5% (25/102) | <0.001* |
| >=0.50D | 22.3% (27/121) | 6.9% (7/102)   | 0.003*  |
| >=0.75D | 6.6% (8/121)   | 2.9% (3/102)   | 0.342   |
| 12M     |                |                |         |
| >=0.25D | 19.0% (23/121) | 2.7% (3/111)   | 0.001*  |
| >=0.50D | 5.0% (6/121)   | 1.8% (2/111)   | 0.284   |
| >=0.75D | 0.8% (1/121)   | 0.0% (0/111)   | 1.000   |

\* chi-square test for proportion between the two groups

**eTable 4.** Baseline Characteristics Between Continued and Interrupted Intervention Groups

| Characteristics  | Continued intervention (N=32) | Interrupted intervention (N=107) | Control (N=139)        |
|------------------|-------------------------------|----------------------------------|------------------------|
| Age, mean (SD)   | 8.27 (1.10)                   | 8.29 (1.11)                      | 8.31 (1.07)            |
| Gender           |                               |                                  |                        |
| Boys             | 14 (43.8%)                    | 57 (53.3%)                       | 48.9% (68/139)         |
| Girls            | 18 (56.2%)                    | 50 (46.7%)                       | 51.1% (71/139)         |
| UCVA             |                               |                                  |                        |
| Mean (SD)        | 0.8 (0.1)                     | 0.8 (0.2)                        | 0.8 (0.2)              |
| Medium (P25-P75) | 0.8(0.8,1.0)                  | 0.8(0.8,1.0)                     | 0.8 (0.8,1.0)          |
| AL               |                               |                                  |                        |
| Mean (SD)        | 23.28 (0.62)                  | 23.39 (0.70)                     | 23.30 (0.69)           |
| Medium (P25-P75) | 23.27(23.02, 23.61)           | 23.40(22.95,23.87)               | 23.25<br>(22.80,23.71) |
| SER              |                               |                                  |                        |
| Mean (SD)        | 0.13 (0.31)                   | 0.14 (0.30)                      | 0.16 (0.28)            |
| Medium (P25-P75) | 0.25(-0.16,0.38)              | 0.25(-0.13,0.38)                 | 0.25 (-0.13,0.38)      |

UCVA, uncorrected visual acuity; AL, axial length; SER, spherical equivalent refraction; SD, standard deviation.

Comparison between either two of the three groups showed no significance.



**eTable 5.** Refractive and Biometric Outcomes at 12-Month Follow-up Between Continued Intervention and Control Group

| Variables              | Continued intervention (N=32) | Control (N=139) | Risk difference (95% CI) | Relative risk (95% CI) | Relative efficacy | P value <sup>a</sup> |
|------------------------|-------------------------------|-----------------|--------------------------|------------------------|-------------------|----------------------|
| Incidence of myopia, % | 28.1% (9/32)                  | 61.3% (68/111)  | 33.2% (15.2%, 51.2%)     | 0.46 (0.26, 0.81)      | 54.1%             | 0.002                |
| Change, mean (SD)      |                               |                 |                          |                        |                   |                      |
| SER, D                 | -0.18 (0.61)                  | -0.76 (0.60)    | -0.58 (-0.82, -0.34)     | -                      | 76.3%             | <0.001               |
| AL, mm                 | 0.24 (0.23)                   | 0.47 (0.25)     | 0.23 (0.14, 0.32)        | -                      | 48.9%             | <0.001               |

Abbreviations: SER, spherical equivalent refraction; AL, axial length, SD, standard deviation; CI, confidence interval

Risk difference = Absolute efficacy = value in control group - value in intervention group

Relative risk = value in intervention group / value in control group

Relative efficacy = (value in control group - value in intervention group)/value in control group

<sup>a</sup> t-test for change of AL and SE; chi-square test for incidence.

**eTable 6.** Refractive and Biometric Outcomes at 12-Month Follow-up in Different Baseline Age Groups

| Variables              | N   | Intervention  | Control       | Absolute efficacy (Relative efficacy) | Difference of efficacy (95%CI) |
|------------------------|-----|---------------|---------------|---------------------------------------|--------------------------------|
| Incidence of myopia, % |     |               |               |                                       |                                |
| baseline 6-8 yrs       | 109 | 49.2% (29/59) | 66.0% (33/50) | 16.9% (25.5%)                         |                                |
| baseline 8-11 yrs      | 122 | 32.8% (20/61) | 57.4% (35/61) | 24.6% (42.9%)                         | -7.7% (-32.8%, 17.3%)          |
| SER change (D)         |     |               |               |                                       |                                |
| baseline 6-8 yrs       | 109 | -0.46 (0.53)  | -0.89 (0.68)  | -0.43 (48.3%)                         |                                |
| baseline 8-11 yrs      | 122 | -0.24 (0.53)  | -0.65 (0.52)  | -0.41 (63.1%)                         | 0.02 (-0.28, 0.31)             |
| AL change (mm)         |     |               |               |                                       |                                |
| baseline 6-8 yrs       | 115 | 0.35 (0.22)   | 0.59 (0.27)   | 0.24 (40.7%)                          |                                |
| baseline 8-11 yrs      | 133 | 0.25 (0.32)   | 0.39 (0.19)   | 0.14 (35.9%)                          | 0.10 (-0.03, 0.23)             |

SER, spherical equivalent refraction; AL, axial length, SD, standard deviation

Absolute efficacy = value in control group - value in intervention group

Relative efficacy = (value in control group - value in intervention group)/value in control group
