# Supplementary material for: Effect of Repeated Low-level Red Light on Myopia Prevention Among Children in China With Premyopia: A Randomized Clinical Trial
Source: PubMed Central journal article supplement (PMC10134010; doi:10.1001/jamanetworkopen.2023.9612), 2023-04-26
Supplement: jamanetwopen-e239612-s003.pdf [file jamanetwopen-e239612-s003.pdf]

## Data Sharing Statement

He. Effect of Repeated Low-Level Red Light on Myopia Prevention Among Children in China With Premyopia. *JAMA Netw Open*. Published April 26, 2023.

doi:10.1001/jamanetworkopen.2023.9612

### Data

**Data available:** No

### Additional Information

**Explanation for why data not available:** Data will be shared upon reasonable request to pursue additional studies or for replication.
